# Supplementary material for: Assessment of Tropical Fish Stocks Using the LBB Method in Dongzhaigang Bay, Hainan Island, China
Source: MDPI journal article supplement (doi:10.3390/su14169933), 2022-08-11

---

## Supplementary Materials

Species with L/F data in 2009, 2014 and 2020

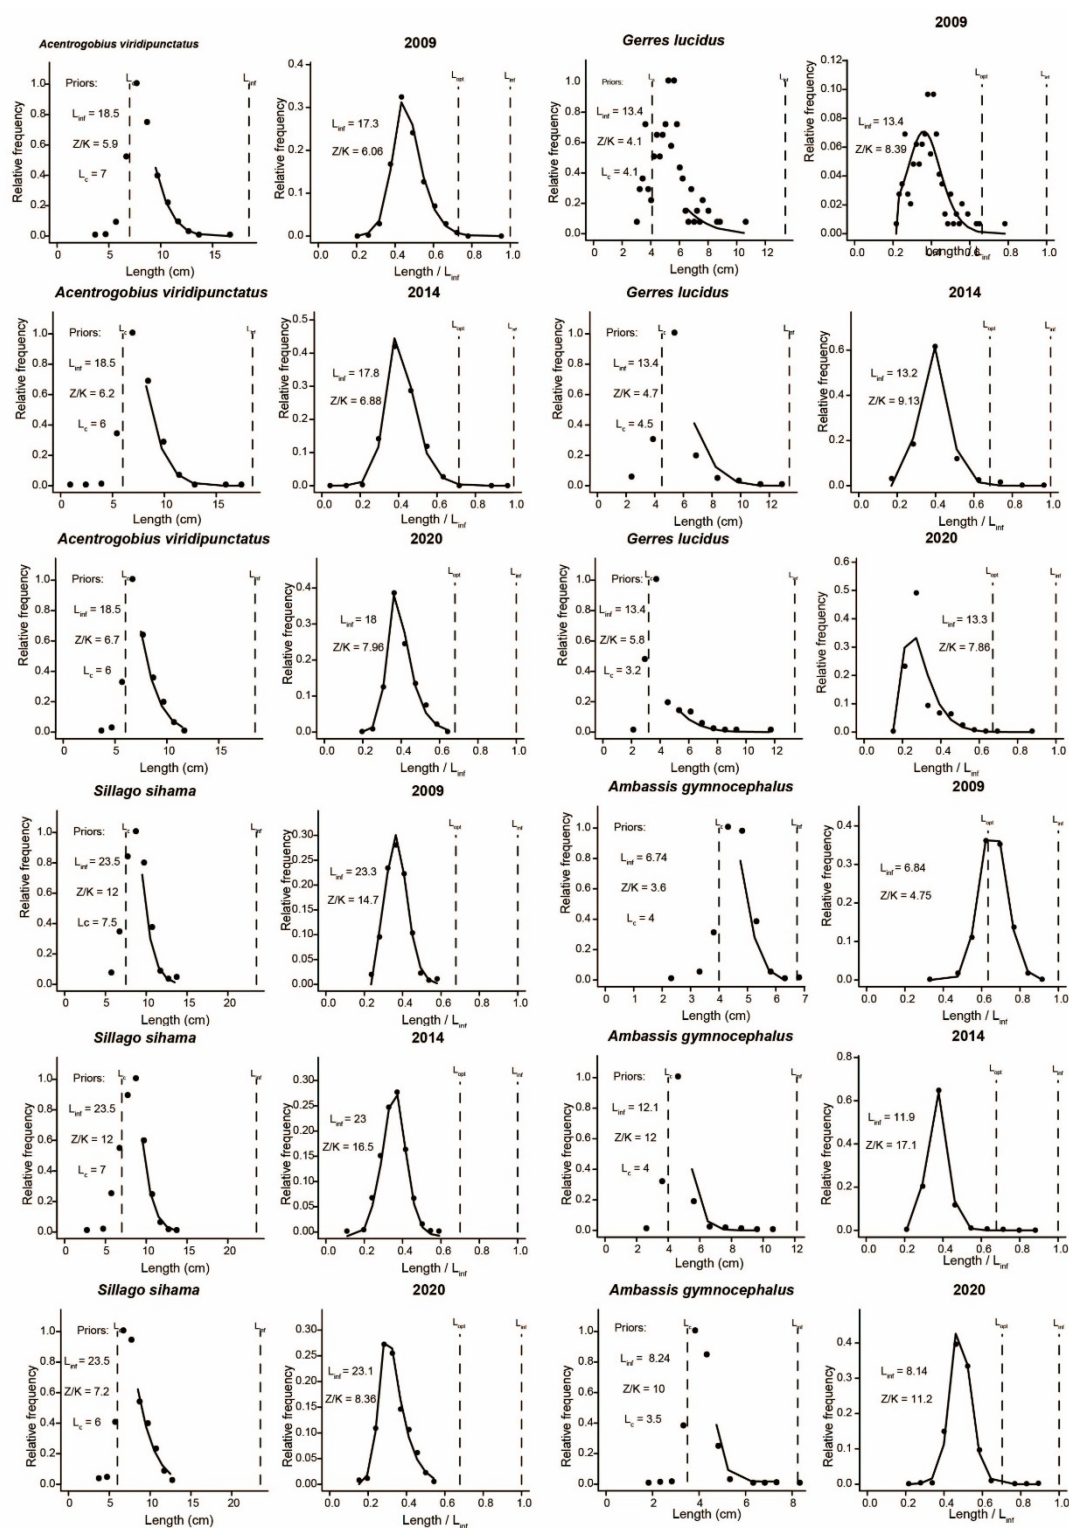

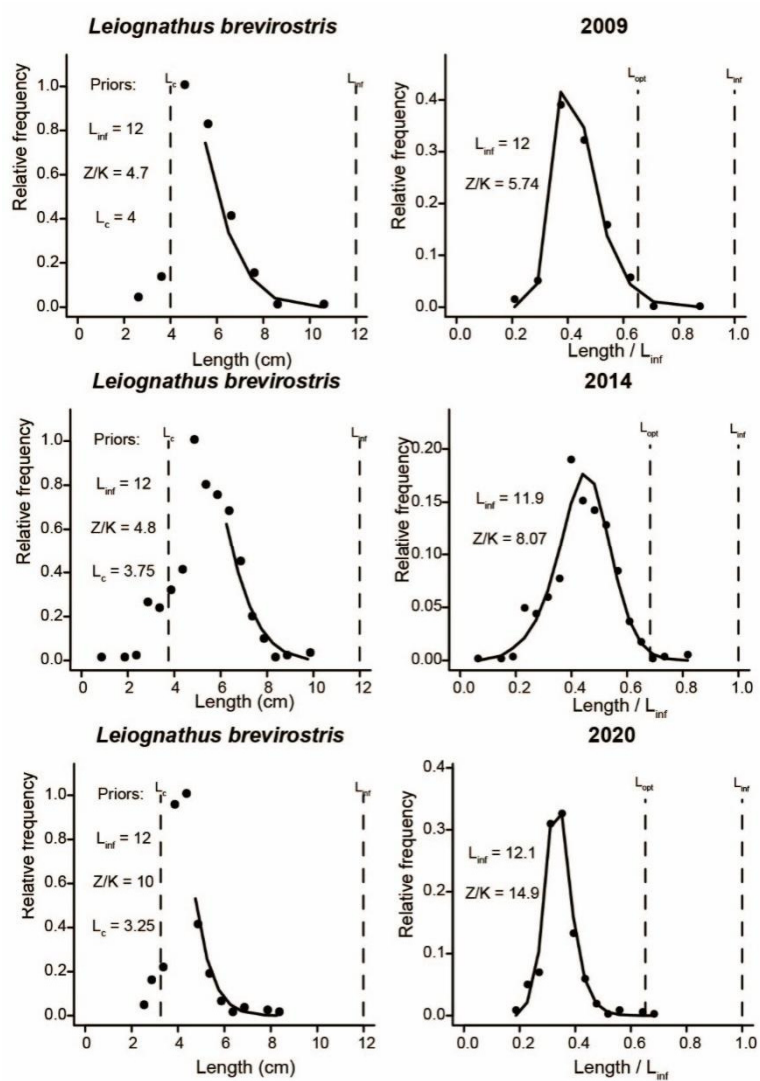

Species with L/F data in only 2 periods

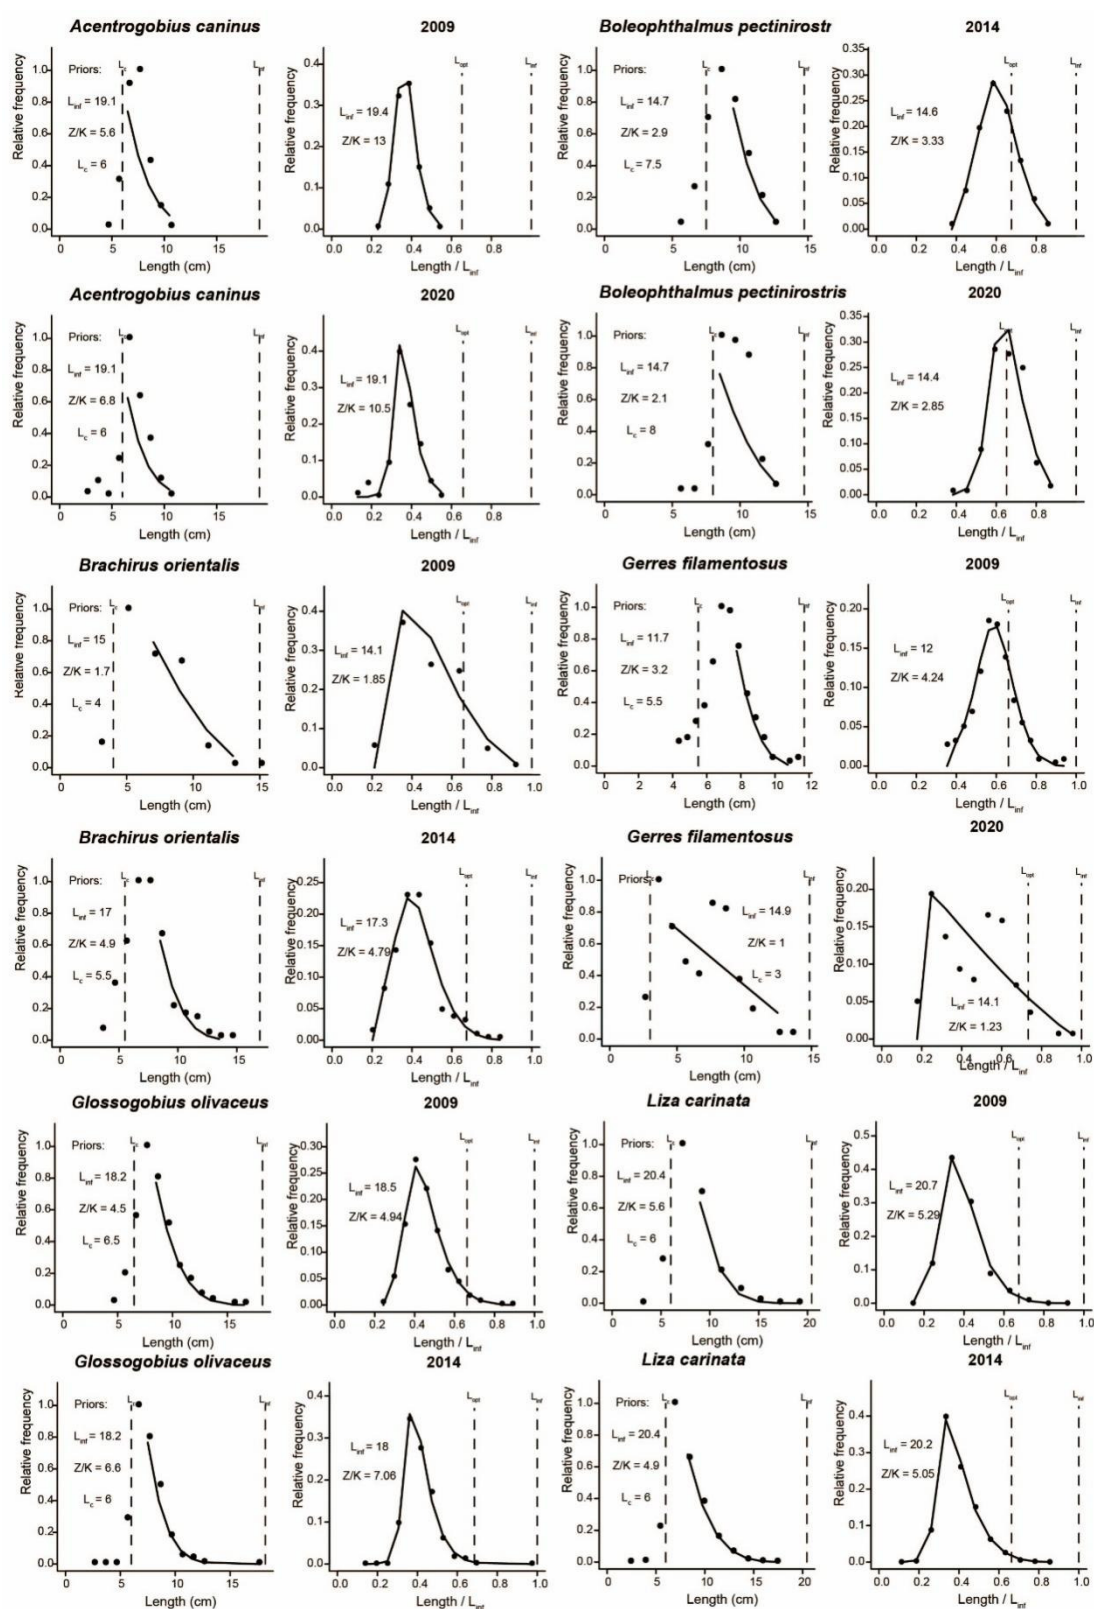

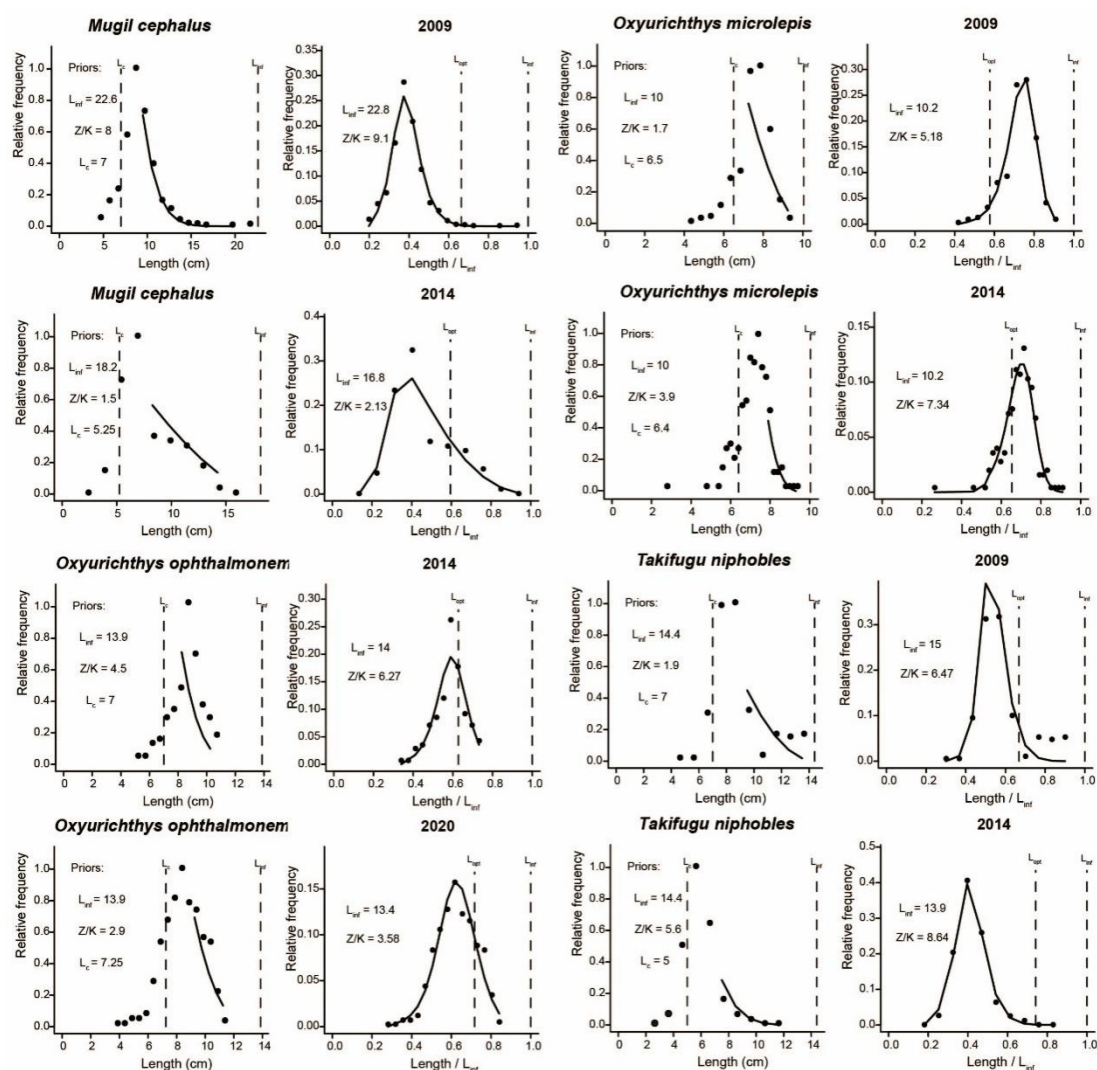

Species with only one year's worth of L/F data



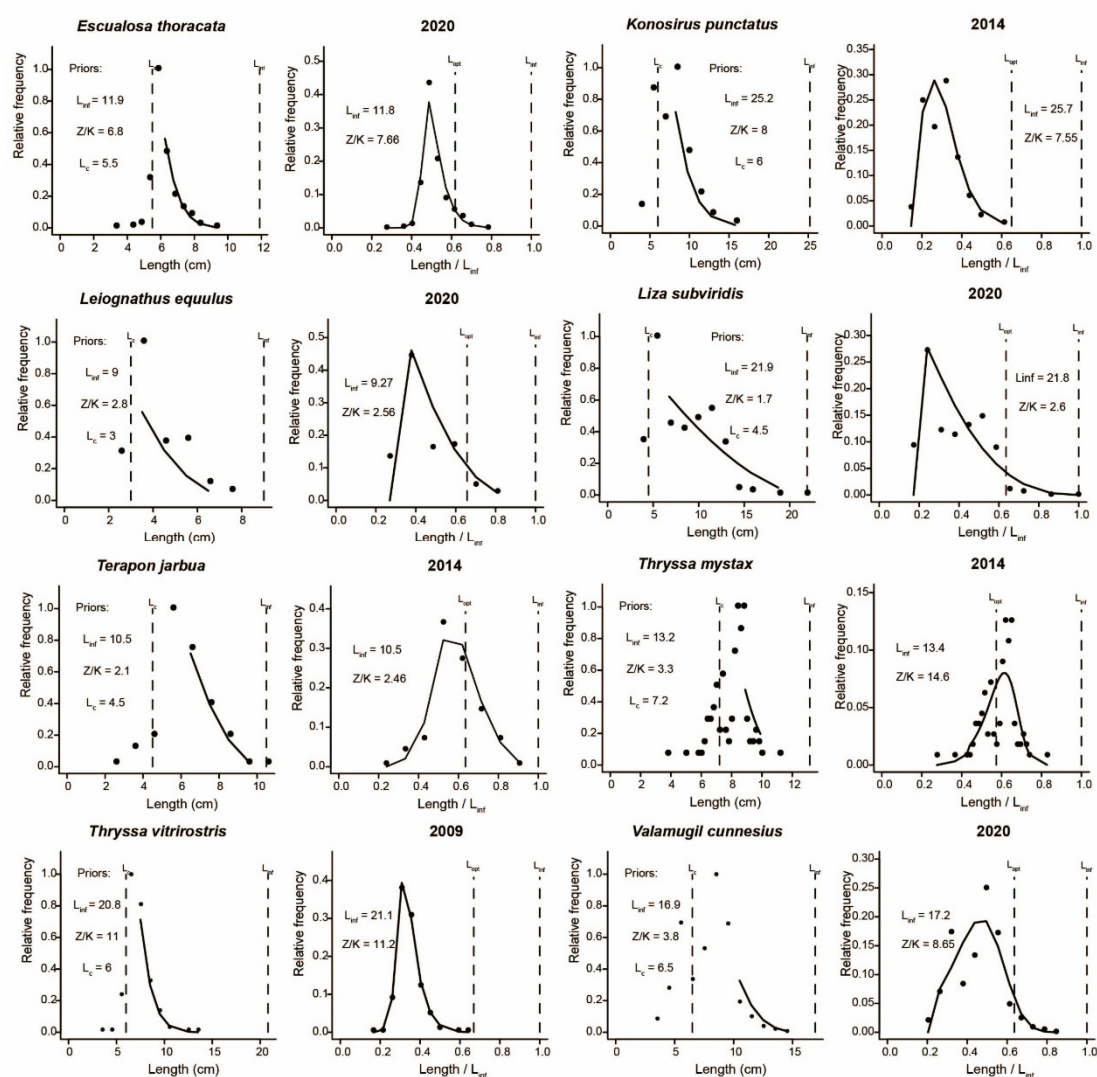

Supplement: s1 [file s1]
