# Supplementary material for: Assessment of Tropical Fish Stocks Using the LBB Method in Dongzhaigang Bay, Hainan Island, China
Source: MDPI journal article supplement (doi:10.3390/su14169933), 2022-08-11
Supplement: s1 [file s1]

Archive with 1 entries (1 files):
- sustainability-1841545-supplementary.pdf
